# Supplementary material
Source: HighWire-hosted journal article supplement (https://tobaccocontrol.bmj.com/highwire/filestream/165762/field_highwire_adjunct_files/3/tc-2022-057764supp004_data_supplement.pdf)
Supplement: tc-2022-057764supp004_data_supplement.pdf [file tc-2022-057764supp004_data_supplement.pdf]

## Supplementary file 4: Threshold of Toxicological Concern (TTC)

Table S4: TTC approach for the 13 flavorings with insufficient toxicological data to apply an MoE approach

| Substance name                            | TTC             |                                 | Substance concentration in e-liquids according to EU-CEG (mg/mL) |         | Daily dose scenario 4 (µg/kg bw/dag) |                | Daily dose scenario 3 (µg/kg bw/dag) |                | Daily dose scenario 2 (µg/kg bw/dag) |               | Daily dose scenario 1 (µg/kg bw/dag) |               |
|-------------------------------------------|-----------------|---------------------------------|------------------------------------------------------------------|---------|--------------------------------------|----------------|--------------------------------------|----------------|--------------------------------------|---------------|--------------------------------------|---------------|
|                                           | (µg/person/day) | TTC <sup>1</sup> (µg/kg bw/day) | Median                                                           | Maximum | Median                               | Maximum        | Median                               | Maximum        | Median                               | Maximum       | Median                               | Maximum       |
| Damascenone                               | 1800            | 25.71                           | 0.03                                                             | 36.99   | 2.60                                 | <b>3698.63</b> | 0.72                                 | <b>1023.29</b> | 0.31                                 | <b>447.69</b> | 0.16                                 | <b>223.85</b> |
| beta-Damascone                            | 1800            | 25.71                           | 0.54                                                             | 10.94   | <b>54.00</b>                         | <b>1094.40</b> | 14.94                                | <b>302.79</b>  | 6.54                                 | <b>132.47</b> | 3.27                                 | <b>66.23</b>  |
| (E)-beta-Damascone                        | 1800            | 25.71                           | 0.14                                                             | 8.40    | 14.09                                | <b>839.50</b>  | 3.90                                 | <b>232.26</b>  | 1.71                                 | <b>101.62</b> | 0.85                                 | <b>50.81</b>  |
| (Z)-beta-Damascone                        | 1800            | 25.71                           | 0.10                                                             | 0.92    | 10.40                                | <b>92.16</b>   | 2.88                                 | 25.50          | 1.26                                 | 11.16         | 0.63                                 | 5.58          |
| Keto-isophorone                           | 540             | 7.71                            | 0.03                                                             | 0.72    | 3.00                                 | <b>71.73</b>   | 0.83                                 | <b>19.84</b>   | 0.36                                 | <b>8.68</b>   | 0.18                                 | 4.34          |
| (E)-beta-Damascenone                      | 1800            | 25.71                           | 0.12                                                             | 4.22    | 11.55                                | <b>422.00</b>  | 3.20                                 | <b>116.75</b>  | 1.40                                 | <b>51.08</b>  | 0.70                                 | 25.54         |
| Isovaleric acid                           | 1800            | 25.71                           | 0.00                                                             | 1.58    | 0.18                                 | <b>158.20</b>  | 0.05                                 | <b>43.77</b>   | 0.02                                 | 19.15         | 0.01                                 | 9.57          |
| 2-Hydroxy-3,5,5-trimethyl-2-cyclohexenone | 540             | 7.71                            | 0.52                                                             | 4.10    | <b>51.98</b>                         | <b>410.09</b>  | <b>14.38</b>                         | <b>113.46</b>  | 6.29                                 | <b>49.64</b>  | 3.15                                 | <b>24.82</b>  |
| 3-Acetylpyridine                          | 540             | 7.71                            | 0.08                                                             | 0.36    | <b>8.31</b>                          | <b>36.38</b>   | 2.30                                 | <b>10.07</b>   | 1.01                                 | 4.40          | 0.50                                 | 2.20          |
| 2,6-Dimethoxyphenol                       | 1800            | 25.71                           | 0.02                                                             | 0.46    | 1.78                                 | <b>46.10</b>   | 0.49                                 | 12.75          | 0.22                                 | 5.58          | 0.11                                 | 2.79          |
| Ambroxide                                 | 90.00           | 1.29                            | 0.00                                                             | 0.32    | 0.26                                 | <b>31.99</b>   | 0.07                                 | <b>8.85</b>    | 0.03                                 | <b>3.87</b>   | 0.02                                 | <b>1.94</b>   |
| 3-Ethylpyridine                           | 540             | 7.71                            | 0.00                                                             | 0.20    | 0.05                                 | <b>20.00</b>   | 0.01                                 | 5.53           | 0.01                                 | 2.42          | 0.00                                 | 1.21          |
| (3aR)-(+)-Sclareolide                     | 90.00           | 1.29                            | 0.00                                                             | 0.25    | 0.10                                 | <b>25.00</b>   | 0.03                                 | <b>6.92</b>    | 0.01                                 | <b>3.03</b>   | 0.01                                 | <b>1.51</b>   |

<sup>1</sup> The daily dose is used to calculate a dose relative to body weight (bw) by using an average body weight of 70 kg.

Numbers in bold indicate for which scenario, substance and concentration in the e-liquid there may be a health risk concern.
